# Supplementary figures and images for: Hyperinsulinemia enhances c-Myc-mediated mammary tumor development and advances metastatic progression to the lung in a mouse model of type 2 diabetes
Source: Springer Nature journal article supplement (doi:10.1186/bcr3089), 2012-01-07

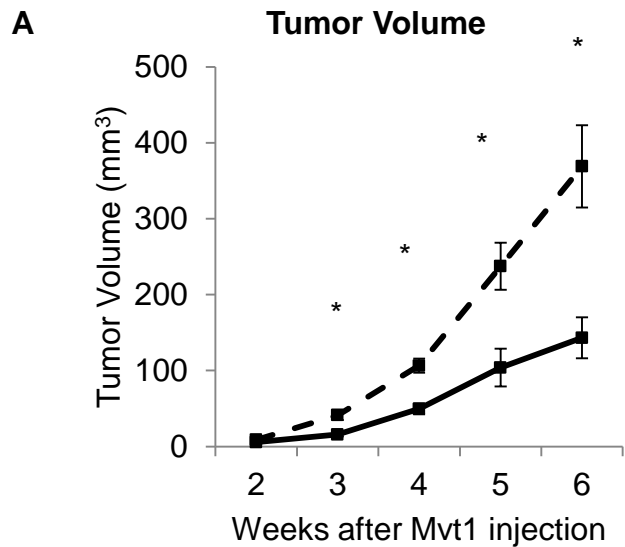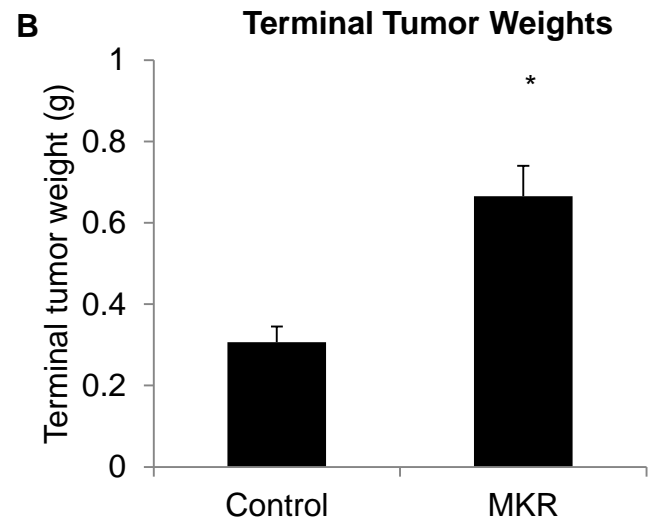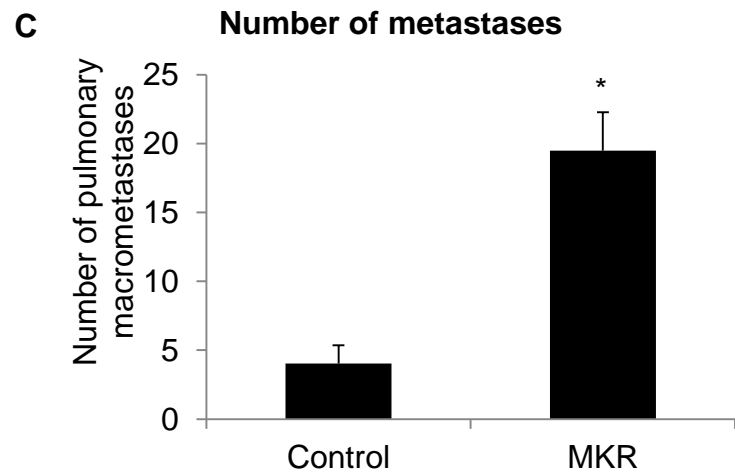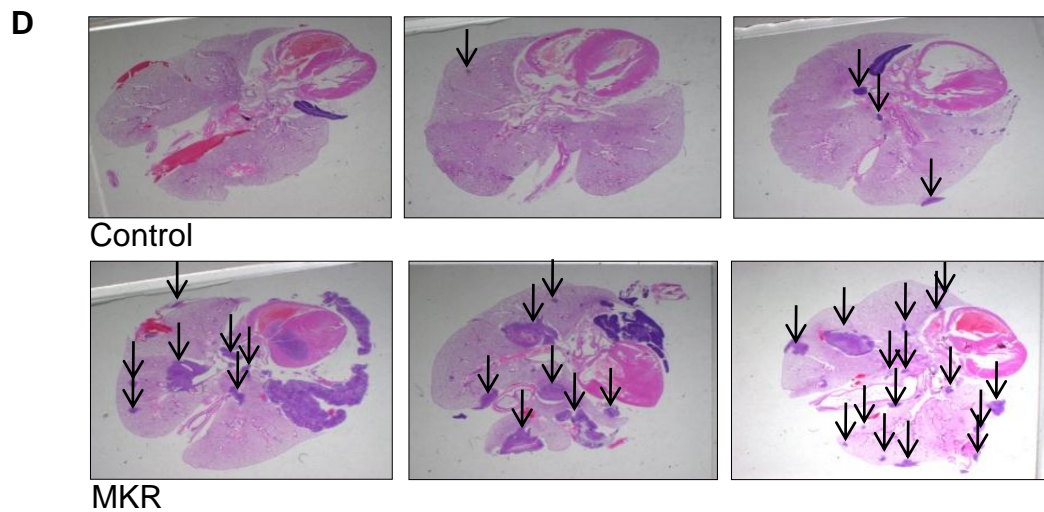

Supplement: 13058_2011_2886_MOESM1_ESM.pdf [file 13058_2011_2886_MOESM1_ESM.pdf]

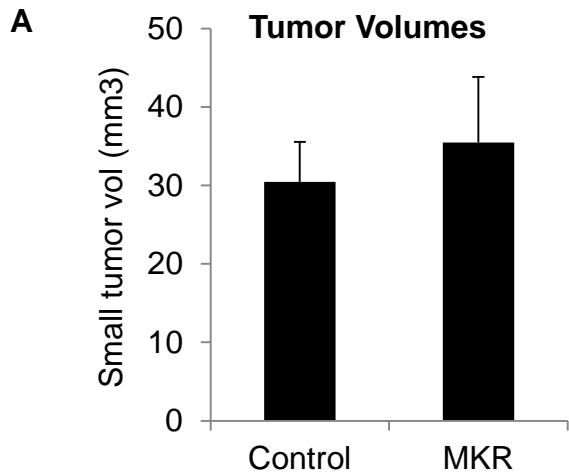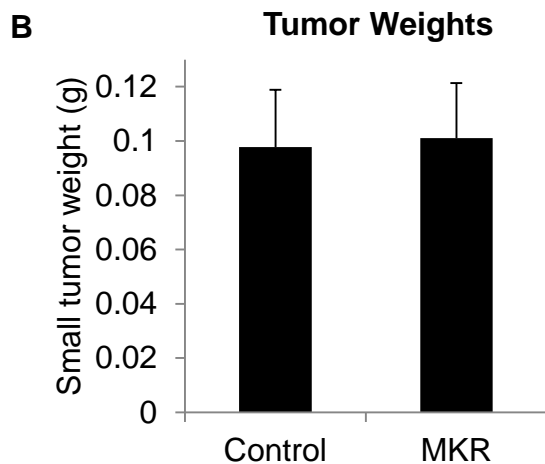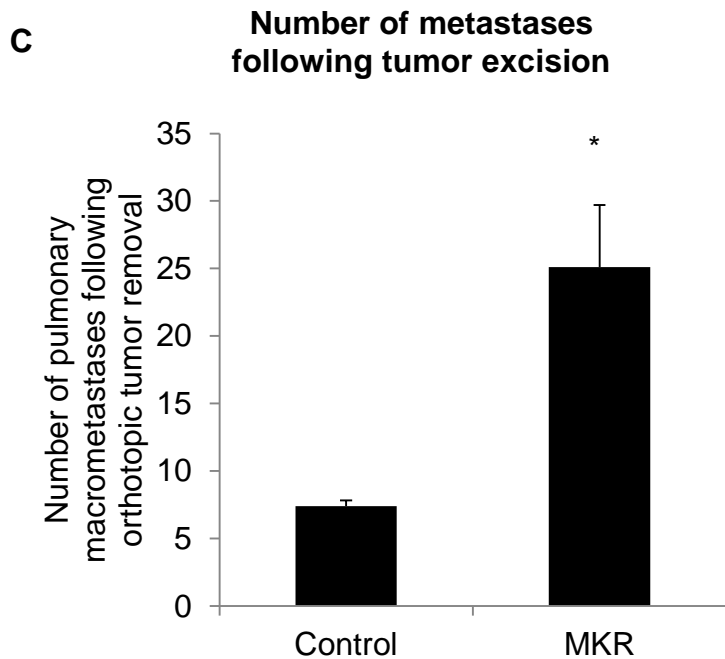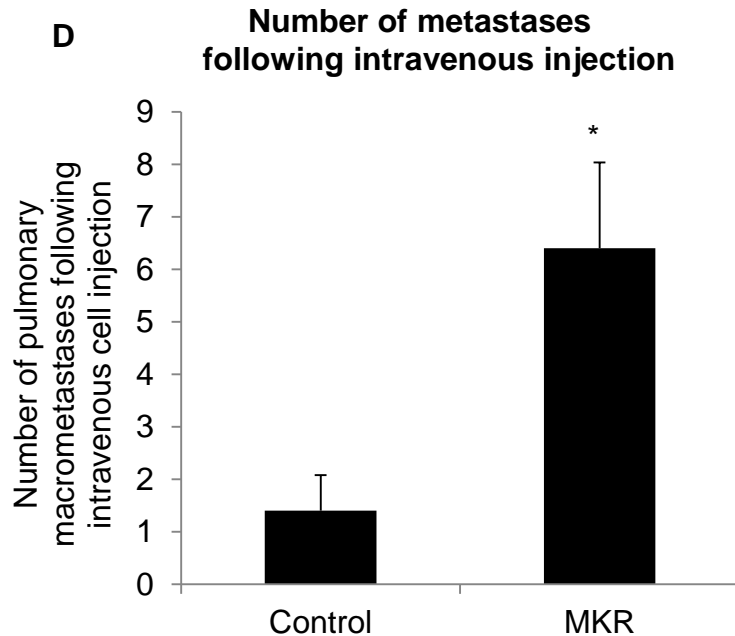

Supplement: 13058_2011_2886_MOESM2_ESM.pdf [file 13058_2011_2886_MOESM2_ESM.pdf]

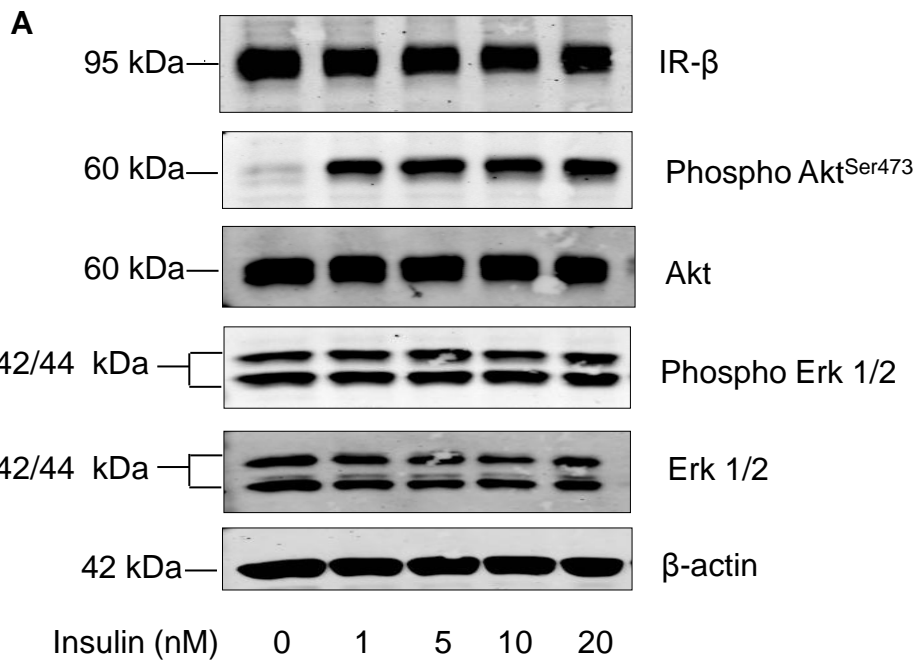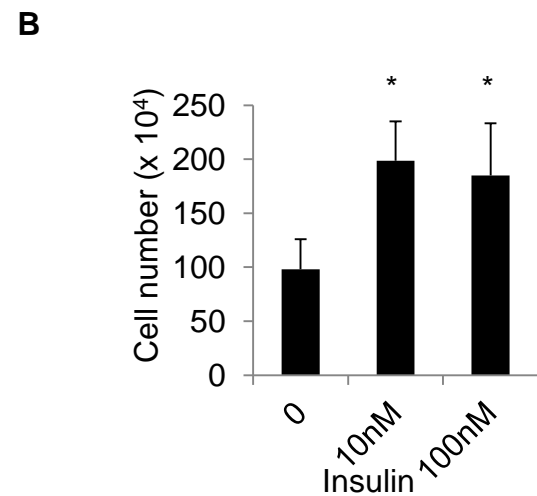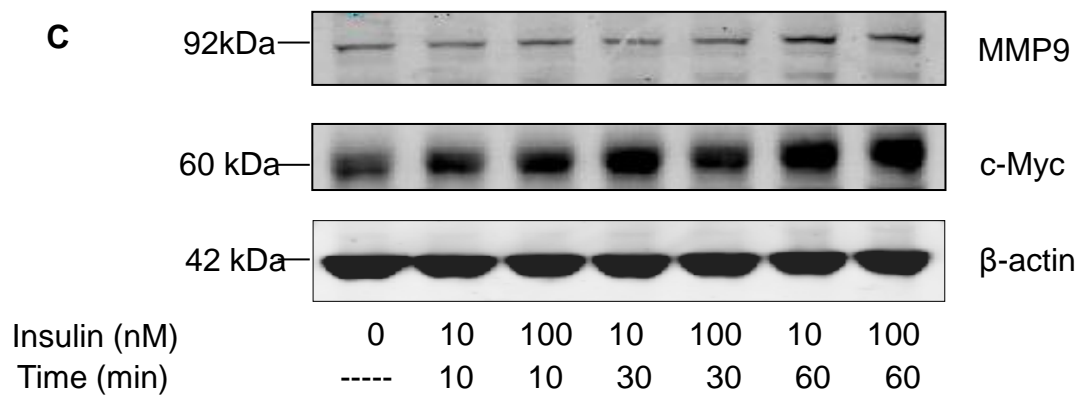

Supplement: 13058_2011_2886_MOESM4_ESM.pdf [file 13058_2011_2886_MOESM4_ESM.pdf]
